# Supplementary material
Source: publisher site journal article supplement (https://www.dovepress.com/article/241162)
Supplement: Supplementary file 1 [file get_supplementary_file.php]

***Supplementary Material***

**Pre-race sleep management strategy and chronotype of offshore solo sailors**

Marco Filardi, Silvia Morini, Giuseppe Plazzi*

**Corresponding Author*:**

Giuseppe Plazzi

Department of Biomedical and Neuromotor Sciences (DIBINEM)

University of Bologna, Bologna, Italy.

Via Foscolo 7, 40123, Bologna, Italy.

Tel.: +39 051 4966964; Fax: +39 051 4966176.

E-mail: [giuseppe.plazzi@unibo.it](mailto:giuseppe.plazzi@unibo.it)

**1 Post-race** **incidents assessment**

The official regatta's report and the individual interviews issued by sailors upon the arrival at each leg were analyzed by a professional sailor with extensive experience in transoceanic sailing competitions (M.P.) to arbitrarily identify incidents occurred during the race. Our expert, blind to the study's aim and participants' status, first analyzed the events reported in the interviews, then verified the appropriateness of this information from the GPS signal considering the possibility of non-reported incidents evident from the GPS tracking. The following incidents were considered as attributable to a lowering of the supervisory threshold: (1) tactical errors that led to lose more than 20 miles compared to the remaining fleet; (2) entanglement with fishermen's nets not previously sighted and (3) collisions with unidentified floating objects. The “20 miles lost” criteria were evaluated considering the Velocity Made Course (VMC), as speed (or distance) towards the direction of the destination. The following incidents were considered not due to human errors: (1) breakage of sails and/or components of the sailing equipment; (2) breakage of rudder and (3) dismasting.

**2 Statistical analysis and results**

Differences in number of sleep-related accidents with respect to the adoption of pre-race sleep management strategy were analyzed through Mann-Whitney U test. Statistical analyses were performed with IBM SPSS Statistics 19 software (SPSS, Inc. Chicago, Ill); p values < 0.05 were considered statistically significant.

No statistically significant differences were observed in total number of sleep-related accidents, accidents at leg1 and at leg2 with respect to the adoption of pre-race sleep management strategy.
